# Supplementary material
Source: PubMed Central journal article supplement (PMC3589821)
Supplement: NIHMS442657-supplement-1_si_001.pdf [file NIHMS442657-supplement-1_si_001.pdf]

THE CRYSTAL STRUCTURE OF  $\alpha$ -DIOXYGENASE PROVIDES INSIGHT INTO DIVERSITY IN  
THE CYCLOOXYGENASE-PEROXIDASE SUPERFAMILY

Christopher C. Goulah<sup>1,a</sup>, Guangyu Zhu<sup>1,a</sup>, Mary Koszelak-Rosenblum<sup>b</sup>, and Michael G. Malkowski<sup>a,b</sup>

From <sup>a</sup>the Hauptman-Woodward Medical Research Institute and <sup>b</sup>Department of Structural Biology, The  
State University of New York at Buffalo, Buffalo, NY, 14203

**SUPPLEMENTARY MATERIAL**

**Table S1. Primers utilized to generate mutant Ath  $\alpha$ DOX constructs.** Only forward primers are listed, with the mutation site highlighted in bold. All primers are listed from 5' to 3'.

| <b>Mutant</b> | <b>Forward primer</b>                                           |
|---------------|-----------------------------------------------------------------|
| Q159N         | GCAGCGAGCTGGATTA <b>ACT</b> TCATGATCCACGAC                      |
| Q159S         | GCAGCGAGCTGGATTT <b>CTT</b> TCATGATCCACGAC                      |
| Q159V         | GCAGCGAGCTGGATT <b>GTTT</b> TCATGATCCACGAC                      |
| H318A         | GCGCGGTTGTGGCTAAAAT <b>CGC</b> GACTATCGACTGGACTGTCCAGC          |
| H318Q         | GCGCGGTTGTGGCTAAAAT <b>CCAG</b> ACTATCGACTGGACTGTCCAGC          |
| T323A         | CCACACTATCGACTGG <b>GCT</b> GTCCAGCTGCTGAAAACC                  |
| T323L         | CCACACTATCGACTGG <b>CTG</b> GTCCAGCTGCTGAAAACC                  |
| Y386F         | CGGAGGATTT <b>CACC</b> AGCGTT <b>TTT</b> CGCATGCACTCTCTGCTGCCGG |
| R565A         | CTTCCTGATCATGGCAAC <b>CCGCG</b> CGTCTGGAAGCTGATCGTTTC           |
| R565K         | CTTCCTGATCATGGCAAC <b>CAA</b> ACGTCTGGAAGCTGATCGTTTC            |
| R565L         | CTTCCTGATCATGGCAAC <b>CC</b> T <b>GCG</b> TCTGGAAGCTGATCGTTTC   |
| R566A         | CCTGATCATGGCAAC <b>CCGCG</b> CGTCTGGAAGCTGATCG                  |
| R566K         | CCTGATCATGGCAAC <b>CCG</b> CA <b>AA</b> CTGGAAGCTGATCG          |
| R566L         | CCTGATCATGGCAAC <b>CCG</b> C <b>TG</b> CTGGAAGCTGATCG           |

**Figure S1. The Cyclooxygenase and  $\alpha$ -Dioxygenase Reaction Mechanisms.** Schematic representation of the reaction mechanisms carried out by COX and  $\alpha$ -DOX enzymes. The 13pro-S hydrogen of arachidonic acid is abstracted by a radical formed on Tyr-385 in COX, while the 2pro-R hydrogen of linoleic acid is abstracted by a radical formed on Tyr-386 in  $\alpha$ -DOX.

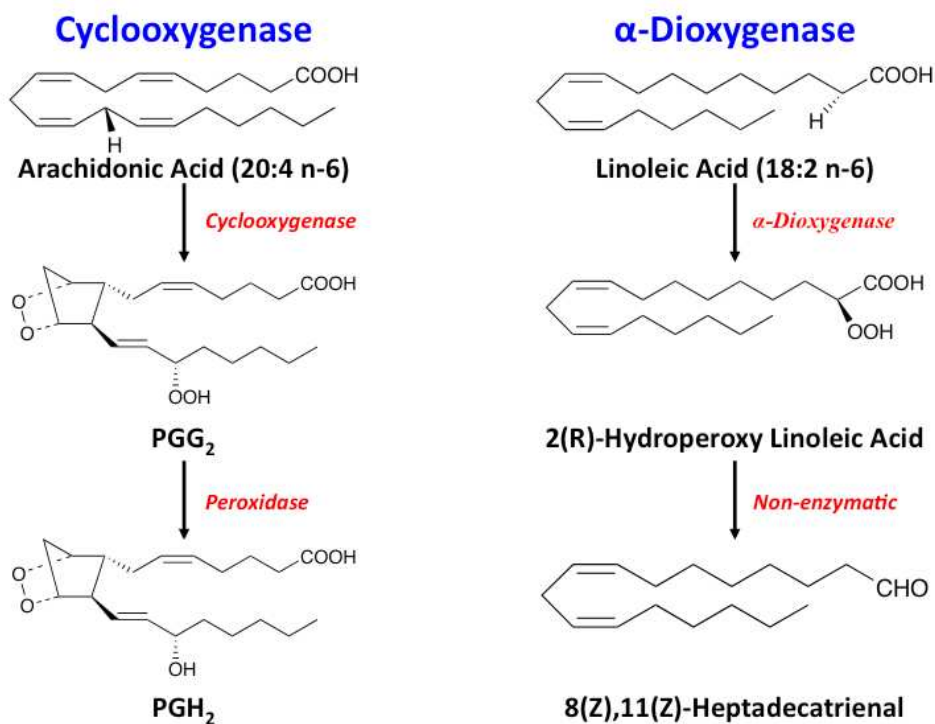

**Figure S2. Secondary Structure Alignment of Ath  $\alpha$ -DOX with murine COX-2.** The amino acid sequence of Ath  $\alpha$ DOX along with the corresponding secondary structure derived from the crystal structure of  $\alpha$ -DOX is shown aligned with the sequence of murine COX-2 and the corresponding secondary structure derived from monomer B of the crystal structure of PDB 3HS5 (1). Boxes depict secondary structural elements in each structure, while dots (.) represent regions with no secondary structure and dashes (-) represent gaps in the alignment. The secondary structural elements that are equivalent between  $\alpha$ -DOX and COX-2 are colored in red and labeled as defined in Ref. (2). Secondary structural elements that are unique to  $\alpha$ -DOX or COX-2 are colored light blue and green, respectively. The numbers above the sequence of COX-2 correspond to residue numbering for ovine COX-1, which is standard in the cyclooxygenase field, whereas the numbers below the sequence of  $\alpha$ -DOX correspond to residue numbering from the *A. thaliana* protein sequence. The proximal and distal histidine residues, the catalytic tyrosine, and residues mutated within this study are shown in bold. h, helix; s, strand.

35 70

COX2 MLFRAVLLCAALGLSQAANPCCSNPCQNRGECMSTGFQYKDCDTRTGFYGENCTTPEFLTRIKLLKPTNTVHY

3HS5 ..... s1 s2 ..... hA hB

XXXX ..... ha hb hc

(DOX MKVITSLISSILLKFIHKDFH-EIYARMSLLDRFLLLIVHG--VDKM

1 30 120 150

COX2 ILTHFKGVNIVNNIPFLRSLTMKYVLTSRSYLIDSPPTYNVHYGYKSWEAFSNL-----SYYTRALPPVA

3HS5 hC hD

XXXX hd he

(DOX VPWHKLPVFLGLTYLEVRRHLHQYNNLLNVGQPTPTGIRFDPANYPYRTADGKFNDPFNEGVSQNSFFGRNCPVD

60 90 110 170 203 207

COX2 DDCPTPMGVKGNKELPDSKEVLEKVLRLREFIPDPQGSNMMFAFFAQHFTHQFFKTDH-----

3HS5 h1 h2

XXXX h1 h2

(DOX -----QKSKLRRPDPMVVATKLLGRKFI DTGKQFNMI AASWIQFMIH DWIDHLEDTHQIELVAPKEVASKCP

140 159 163 220 250

COX2 -----KRGPGFTRGLGHGVLDLNHIYGETLDRQHKLRLFKDGLKLYQVIGGEVYPPTVKDTQVEM

3HS5 hf h3 s3 s4

XXXX hf h3

(DOX LSSFRFLKTKEVPTGFFEIKTGSQNI RTPWWDSSVIYGSNSKTLDRVRTYKDGKLIKISEE--TGLLLHDE-----

210 240 290 320

COX2 IYPPHIPENLQFAVGQEVFGLVPLMMYATIWLREHNRVCDILKQEHPEWGDEQLFQTSRLILIGETIKIVIEDYV

3HS5 h5 h6

XXXX h5 h6

(DOX -----DGLAISGDIRN-SWAGVSALQALFIKEHNAVCDALKDEDDDEDEDLYRYARLVTSAVVAKIHTIDWT

270 300 318 355 385

COX2 QHLSGYHFKLKFDP-----ELLF-----NQQFQYQNRIASEFNTLYHWHPLLPDPTFNIE

3HS5 h7 hg hh h8 sa

XXXX h7 hg hh h8 sa

(DOX VQLLKTDTLLAGMRANWYGLLGKKFKDSFGHAGSSILGGVVMKKPQNHGVPYSLTEDFTSVYRMSHLLPDQLHLI

330 386 400 440

COX2 -----DQEYSFKQFLY--NNSILLEHGLTQFVESFTRQIAGR VAGGRNVPIAVQ-----

3HS5 h9 h10

XXXX sb hi h9 h10 hj

(DOX DIDDVPGTNKSLPLIQEISMRDLIGRKGEETMSHIGFTKLMVSMGHQASGAL-ELMNYPMWLRDIVPHDPNGQARP

420 460 490

COX2 ---AVAKASIDQSREMKYQSLNEYRKRFSLPKPYTSFEELTGEKEMAAELKALY-SDIDVMELYPALLVEKPRPDAI

3HS5 h11/12 h13 h14 h15 h16

XXXX h11/12 h13 h14 h15 h16

(DOX DHVDLAALEIYDRERSVPRYNEFRSMFMIPITKWEDLTEDEEAIEVLDDVYDGDVEELDLLVGLMAEKKIKGFA

490 510 540 530 580

COX2 FGETMVELGAPFSLKGLMGNPICSPQYWKPSTFGGEVGFKIINTA-SIQSLICNNVKGCPF-----TSFNVQDP

3HS5 h17 h18 h19

XXXX h17 hk h1 h18 h19 hm

(DOX ISETAFYIFLIMATRRLLEADRFFTS-DFNETIYT-KKGLEWVNTTESLKDVIDRH-YPDMTDKWMNSESAF SVWDS

566 600 600

COX2 QPTKTATINASASHSRLDDINPTVLIKRRSTEL

3HS5

XXXX

(DOX -----PPLTKNPIPLYLRIPS--

630

**Figure S3. Imidazole Bound to the Heme.** Stereo view of the distal face of the heme with imidazole bound to the iron atom.  $2F_O-F_C$  electron density covering imidazole and the heme, contoured at  $1\sigma$ , is shown in blue. The proximal (His-389) and distal (His-163) histidines are labeled accordingly.

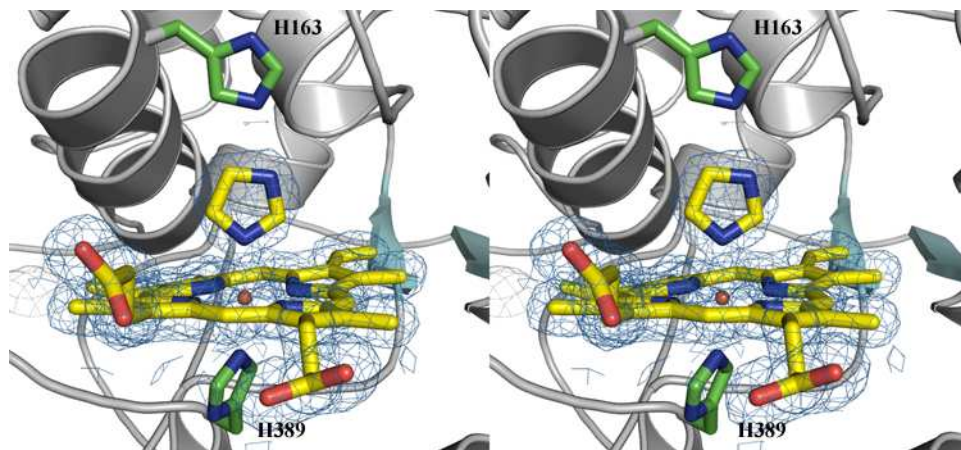

**Figure S4. Purity of Wild Type and Mutant Constructs of Ath  $\alpha$ -DOX.** SDS-PAGE analysis of wild type and mutant constructs of (A) Gln-159; (B) His-318 and Thr-323; and (C) Arg-565 and Arg-566.

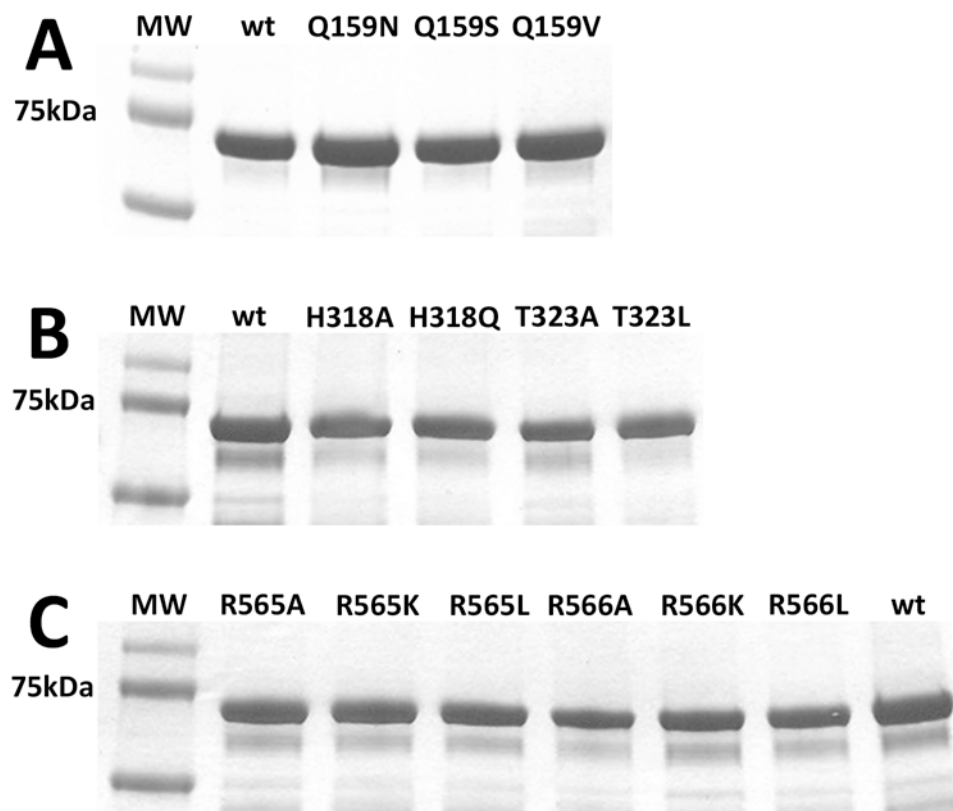

**Figure S5. Model of LA Bound Within the Active Site Channel of  $\alpha$ -DOX.** Linoleic acid (LA; 18:2  $\omega$ -6) is depicted in stick representation (light blue) bound between helices H6 and H17 in the active site channel of  $\alpha$ -DOX. Carbon-2 of LA lies  $\sim 2.8\text{\AA}$  below the catalytic tyrosine, Tyr-386, which is poised for abstraction of the *2proR* hydrogen. The carboxylate of LA is positioned to interact with the side chains of His-318, Thr-323, and Arg-566. Portions of helices H2, H6, H8, and H17 were removed for clarity.

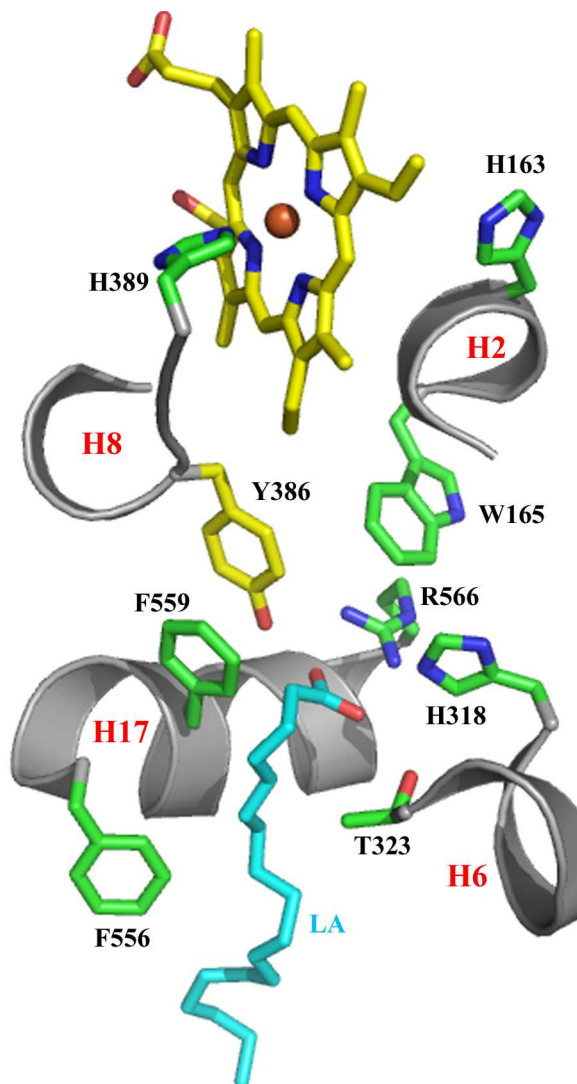

## REFERENCES

1. Vecchio, A. J., Simmons, D. M., and Malkowski, M. G. (2010) Structural basis of fatty acid substrate binding to cyclooxygenase-2, *J Biol Chem* 285, 22152-22163.
2. Picot, D., Loll, P. J., and Garavito, R. M. (1994) The X-ray crystal structure of the membrane protein prostaglandin H2 synthase-1, *Nature* 367, 243-249.
